# Supplementary material
Source: HighWire-hosted journal article supplement (https://gh.bmj.com/content/5/1/e002000)
Supplement: inline-supplementary-material-3 [file inline-supplementary-material-3.pdf]

*Polio*

218

**Ward Focal Supervisor Activity Card (WFSAC)**

**Level 3**

**OCTOBER 2017 SIPDs - NIGERIA**

|                                                                 |                                      |                                     |                                       |                               |                          |  |
|-----------------------------------------------------------------|--------------------------------------|-------------------------------------|---------------------------------------|-------------------------------|--------------------------|--|
| <b>Immunization Plus Days (IPDs) Implementation Date:</b> ..... |                                      |                                     |                                       | PLEASE AFFIX PHOTO HERE       |                          |  |
| <b>STATE:</b>                                                   |                                      | <b>LGA:</b>                         |                                       |                               | <b>WARD:</b>             |  |
| Name of Ward Focal Supervisor:                                  |                                      | Signature of Ward Focal Supervisor: |                                       |                               | <b>DISTRICT:</b>         |  |
| Your Own Mobile Phone Number:                                   |                                      | Date of Birth:                      |                                       |                               | Name of LGA Team Member: |  |
| Personal Bank Account Number:                                   |                                      | Name of Bank:                       |                                       | Signature of LGA Team Member: |                          |  |
| <b>Description of activity</b>                                  | <b>Signature of LGA Team Member:</b> | <b>Description of activity</b>      | <b>Signature of LGA Team Member:</b>  |                               |                          |  |
| IPDs day 1 @ N 1,300.00                                         |                                      | IPDs day 5 @ N 1,300.00             |                                       |                               |                          |  |
| IPDs day 2 @ N 1,300.00                                         |                                      | IPDs day 6 @ N 1,300.00             |                                       |                               |                          |  |
| IPDs day 3 @ N 1,300.00                                         |                                      |                                     |                                       |                               |                          |  |
| IPDs day 4 @ N 1,300.00                                         |                                      |                                     |                                       |                               |                          |  |
|                                                                 |                                      | Transport allowance                 |                                       |                               |                          |  |
| <b>This section for Bank use only:</b>                          |                                      |                                     |                                       |                               |                          |  |
| Date of Disbursement: _____                                     |                                      |                                     | Amount Disbursed: _____               |                               |                          |  |
| _____<br>Name of Paying Officer                                 |                                      |                                     | _____<br>Signature of Paying Officer  |                               |                          |  |
| _____<br>Name of LGA Team Member                                |                                      |                                     | _____<br>Signature of LGA Team Member |                               |                          |  |
| _____<br>Name of Payee                                          |                                      |                                     | _____<br>Signature of Payee           |                               |                          |  |
